# Supplementary material
Source: PubMed Central journal article supplement (PMC4583336)
Supplement: NIHMS685817-supplement-supplement_1.pdf [file NIHMS685817-supplement-supplement_1.pdf]

**Supplemental Table 1.** Mean<sup>a</sup> ( $\pm$  SD) arsenic concentrations of measured biomarkers, stratified by household drinking water arsenic concentration.

| Exposure                     | Maternal                  |             |                             |             | Maternal/Fetal             |             | Infant                      |             |
|------------------------------|---------------------------|-------------|-----------------------------|-------------|----------------------------|-------------|-----------------------------|-------------|
|                              | Urine ( $\mu\text{g/L}$ ) |             | Toenail ( $\mu\text{g/g}$ ) |             | Placenta ( $\text{ng/g}$ ) |             | Toenail ( $\mu\text{g/g}$ ) |             |
|                              | N (%)                     | Mean (SD)   | N (%)                       | Mean (SD)   | N (%)                      | Mean (SD)   | N (%)                       | Mean (SD)   |
| Water [As] <sup>b</sup>      |                           |             |                             |             |                            |             |                             |             |
| <10 $\mu\text{g/L}$          | 523 (84)                  | 4.5 (4.7)   | 521 (90)                    | 0.06 (0.06) | 647 (85)                   | 0.99 (1.22) | 130 (85)                    | 0.11 (0.26) |
| >10 $\mu\text{g/L}$          | 63 (10)                   | 11.5 (11.6) | 53 (9)                      | 0.20 (0.14) | 68 (9)                     | 2.13 (2.79) | 23 (15)                     | 0.15 (0.23) |
| <i>P</i> -value <sup>c</sup> | <0.0001*                  |             | <0.0001*                    |             | <0.0001*                   |             | 0.5227                      |             |

<sup>a</sup>Arithmetic

<sup>b</sup>Stratification is based on the current MCL for arsenic in drinking water (10  $\mu\text{g/L}$ )

<sup>c</sup>*P*-values are results of one-way ANOVA between arsenic concentrations in biomarkers by categories of drinking water arsenic below and above the MCL.

Missing data accounted for 6% of maternal urinary arsenic measurements (mean  $20.5 \pm \text{SD } 53.5 \mu\text{g/L}$ ); 1% of maternal toenail arsenic measurements (mean  $0.03 \pm \text{SD } 0.03 \mu\text{g/g}$ ) and 7% of placental arsenic measurements (mean  $1.22 \pm \text{SD } 2.62 \text{ ng/g}$ ).
